# Supplementary material
Source: PubMed Central journal article supplement (PMC7294288)
Supplement: mmc1.pdf [file mmc1.pdf]

**Appendix**  
**Financial Risk for COVID-19-like Respiratory Hospitalizations in Consumer-Directed Health Plans**  
**Eisenberg et al.**

**Appendix Table 1.** Average and Median Out-of-Pocket (OOP) Spending Comparing Consumer-Directed Health Plan (CDHP) and Traditional Plan Enrollees With a Respiratory-Related Hospitalization, by Age Group and Quarter of Year

| Subsample  | Mean             |       |                           | Median           |       |                            |
|------------|------------------|-------|---------------------------|------------------|-------|----------------------------|
|            | Traditional plan | CDHP  | T-test<br><i>p</i> -value | Traditional plan | CDHP  | KS test<br><i>p</i> -value |
| All ages   | 1,653            | 1,961 | <0.001                    | 1,178            | 1,520 | <0.001                     |
| Ages 0–21  | 1,685            | 2,237 | <0.001                    | 1,342            | 1,972 | <0.001                     |
| Ages 22–39 | 1,695            | 1,928 | <0.001                    | 1,218            | 1,440 | <0.001                     |
| Ages 40–55 | 1,684            | 1,854 | <0.001                    | 1,147            | 1,344 | <0.001                     |
| Ages 56–64 | 1,578            | 1,708 | 0.001                     | 996              | 1,136 | <0.001                     |
| Quarter 1  | 1,978            | 2,578 | <0.001                    | 1,642            | 2,457 | <0.001                     |
| Quarter 2  | 1,580            | 1,798 | <0.001                    | 1,072            | 1,296 | <0.001                     |
| Quarter 3  | 1,350            | 1,496 | 0.002                     | 643              | 731   | 0.002                      |
| Quarter 4  | 1,363            | 1,377 | 0.751                     | 700              | 613   | <0.001                     |

*Notes:* Analytic sample includes hospitalizations from January 1, 2016 through August 31, 2019 for individuals continuously enrolled for at least 1 month before and 1 month after the hospitalization. Costs are normalized to August 2019 dollars. Hospitalizations were for pneumonia, acute bronchitis, lower respiratory infections, and acute respiratory distress syndrome (ARDS). Consumer-directed health plans (CDHPs) were defined as plans coupled with a Health Savings Account or Health Reimbursement Account. Traditional plans were defined as plans that were not coupled with an account. Note that some individuals may have had multiple hospitalizations.

**Appendix**  
**Financial Risk for COVID-19-like Respiratory Hospitalizations in Consumer-Directed Health Plans**  
**Eisenberg et al.**

**Appendix Figure 1.** Average out-of-pocket (OOP) spending comparing consumer-directed health plan (CDHP) and traditional plan enrollees, alternate specifications and samples.

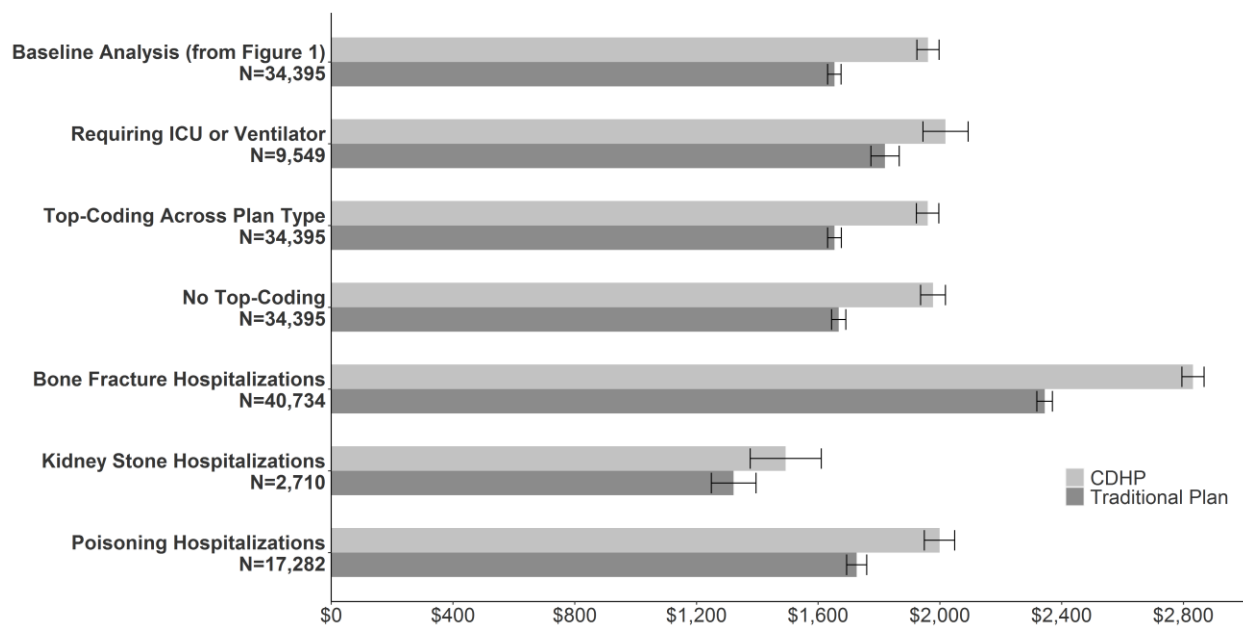

*Notes:* Analytic sample includes hospitalizations from January 1, 2016 through August 31, 2019 for individuals continuously enrolled for at least 1 month before and 1 month after the hospitalization. Costs are normalized to August 2019 dollars. Respiratory hospitalizations were for pneumonia, acute bronchitis, lower respiratory infections, and acute respiratory distress syndrome (ARDS). Hospitalizations requiring ICU or a ventilator were identified from revenue and procedure codes. The baseline analysis top-coded spending at the 99th percentile within each plan group. The top-coding across plan type analysis top-coded the entire sample at the 99th percentile. Bone fracture hospitalizations include any bone fracture not related to osteoporosis. Kidney stone hospitalizations included any hospitalization for kidney stones, identified via diagnosis codes. Poisoning hospitalizations included any hospitalization for an acute poisoning event, identified via diagnosis codes. Consumer-directed health plans (CDHPs) were defined as plans coupled with a Health Savings Account or Health Reimbursement Account. Traditional plans were defined as plans that were not coupled with an account. Note that some individuals may have had multiple hospitalizations.
